# Supplementary material for: Thermodynamic and kinetic hydricities of metal-free hydrides
Source: Royal Society of Chemistry journal article supplement (doi:10.1039/c7cs00171a), 2018-01-01
Supplement: c7cs00171a2.xlsx [file c7cs00171a2.xlsx]

## Sheet: Table
HYDRIDE GROUP		HYDRIDE STRUCTURE			STRUCTURE	METHOD OF DETERMINATION		SOLVENT	ΔGH- (kcal/mol)		ΔHH- (kcal/mol)		s, N			E1 (vs. NHE)	E2 (vs. NHE)	pKa	BDE (kcal/mol)
						Experimental	Calculated		Experimental	Calculated	Experimental	Calculated	Experimental s	Experimental N	Calculated N	Experimental	Experimental		ΔG	ΔH		Calculated in this work
CARBON - BASED	ARYLMETHANES				X = H, Ar =
					p-NO2-C6H4-	potential-pKa	isodesmic	MeCN	129	127.1						1.4	0.12	29	83.1394
					m-CN-C6H4-	potential-pKa		MeCN	129							1.35	-0.87	46	83.498
					p-CN-C6H4-	potential-pKa	isodesmic	MeCN	122	126.2						1.07	-0.53	40.4	83.7
					p-MeCO-C6H4-	potential-pKa		MeCN	124							1.14	-0.47	39.2	83.4468
					p-F-C6H4-	potential-pKa	isodesmic	MeCN	123	117.5						1.16	-1.26	51.4	81.8702
					p-Cl-C6H4-	potential-pKa	isodesmic	MeCN	123	118						1.15	-1.16	50	82.2666
					Ph-	potential-pKa	isodesmic	MeCN	118	118						0.97	-1.19	50.3	81.984
						potential-pKa		DMSO	113							0.85		43.2	82.8
					p-Me-C6H4-	potential-pKa	isodesmic	MeCN	112	113.1						0.74	-1.38	53	81.2854
					p-MeO-C6H4-	potential-pKa	isodesmic	MeCN	107	106						0.54	-1.51	54.4	80.1972
					X = CN, Ar =
					p-CN-C6H4-	potential-pKa	isodesmic	MeCN	129.2	129.4						1.65			83
					Ph-	potential-pKa	isodesmic	MeCN	120.5	122.4						1.31			82.2
					p-MeO-C6H4-	potential-pKa	isodesmic	MeCN	105.6	108.4						0.723			80.9
					Ar1 = Ar2 = Ph, Ar3 =
					H-	potential-pKa	scaling	DMSO	105	103.9		116.3		-5.47		0.6	-1	32.2	82
					p-F-C6H4-	potential-pKa	isodesmic	MeCN	98	93.6						0.38			79.2
					p-Ph-C6H4-	potential-pKa	scaling	DMSO	96 (94.4)	93.3		102				0.256	-0.879	29.4	81
						potential-pKa		MeCN	97.9							0.35			80.6
					p-PhCO-C6H4-	potential-pKa	scaling	DMSO	94.7	97.1		107.4				0.449		22.5	79
					p-NO2-C6H4-	potential-pKa	isodesmic	DMSO	96.9	98.05						0.567		16.8	81
					p-Me-C6H4-	potential-pKa	isodesmic	MeCN	96.1	91.8				-3.63		0.3			80
					p-MeS-C6H4-	potential-pKa	scaling	MeCN	95.4	92.6		98.5				0.23			80.9
					m-MeO-C6H4-	potential-pKa	scaling	MeCN	97.6	97.4		104.2				0.36			80
					p-MeO-C6H4-	potential-pKa	isodesmic	MeCN	93.9	88.4				0		0.17			80.9
					p-Me2N-C6H4-	potential-pKa	isodesmic	MeCN	82.9	79.6				7.02		-0.27			80
					Ar1 = Ar2 = Ar3 =
					p-H-C6F4-	potential-pKa		DMSO	116.5							0.91		13.3	82.8
					p- Br-C6F4-	potential-pKa		DMSO	114.5							0.85		11.2	82.5
					p-NO2-C6H4-	potential-pKa		DMSO	106.3							0.82			79
					p-Cl-C6H4-	potential-pKa	scaling	DMSO	98	97.9		107.9				0.367	-0.731	27	77.1599
					Ph-	potential-pKa	scaling	DMSO	96	94.4		103.8		0.8	-4.27	0.28	-0.949	30.7	77.1797
						potential-pKa	isodesmic	MeCN	99	94.9		97.5				0.29			81
					p-Me-C6H4-	potential-pKa	scaling	MeCN	93.4	89.3		97				0.19			80
					p-MeO-C6H4-	potential-pKa	scaling	MeCN	86.1	83.1		87.6				-0.11			78.1
					o-MeO-o-MeO-C6H3-	potential-pKa	Krylov'method	DMSO	83.5	84.1						0.24	-1.24	26.9	77.3374
						potential-pKa	Krylov'method	MeCN		85.8
					p-Me2N-C6H4-	potential-pKa		DMSO	76							-0.572	-1.51	40.3	77.3374
						potential-pKa	scaling	MeCN	74	65.1		68.9				-0.75			80
	FLUORENE				R =
					MeCO2-	potential-pKa	scaling	DMSO	114	112.8		131.6				1.24	0.045	10.3	72.2757
					H-	potential-pKa	scaling	DMSO	109 (105.8)	110.9		127.1				0.87	-0.532	22.6	75.7473
					tBu-	potential-pKa	scaling	DMSO	108	105.4		119.9				0.79	-0.58	24.3	76.9592
					m-Cl-C6H4-	potential-pKa	scaling	DMSO	102	103.6		116				0.8	-0.401	16.8	70.8569
					Mes-	potential-pKa	scaling	DMSO	101.2	101.1		115.1				0.75		18.7	71.1
					o-MeO-C6H4-	potential-pKa	scaling	DMSO	101.1	95.7		106.2				0.72		18.9	71.8
					Ph-	potential-pKa	scaling	DMSO	97 (97)	100.6		112.7				0.59	-0.491	18	70.4183
					PhS-	potential-pKa	scaling	DMSO	97	97.6		109.2				0.59	-0.312	15.4	70.9997
					MeO-	potential-pKa	scaling	DMSO	89	89.5		98.7				0.29	-0.787	22.1	69.185
					Me2N-	potential-pKa	scaling	DMSO	70.4 (88)	74.2		80				0.3	-0.845	22.5	71.5
	DIHYDRO-HETEROAROMATICS				X = C-Me, R =
					NO2-	potential-pKa		DMSO	120							1.25	0.158	13.2	78.8371
					Cl-	potential-pKa		DMSO	105							0.66	-0.81	28.2	76.975
					H-	potential-pKa		DMSO	98				0.92	-0.86		0.33	-0.952	31.3	77.9289
					Me-	potential-pKa		DMSO	95							0.17	-0.978	31.8	78.0113
					MeO-	potential-pKa		DMSO	91							0.05	-1	31.8	77.504
					R = H, X =
					C-CH2OPh	potential-pKa		DMSO	111							0.96	-0.976	30.2	75.875
					C-CH2SPh	potential-pKa		DMSO	109							0.82	-0.825	28.6	77.1747
					C-CH2OMe	potential-pKa		DMSO	102							0.69	-1.098	30.6	73.6073
					X = S, R =
					Ph-	potential-pKa	scaling	DMSO	90	85.5		92.7				0.165	-0.889	27.3	73.9257
					H-	calorimetry	scaling	MeCN		89.5	94.1	92.7				-0.403
					X = O, R =
					CN-	potential-pKa	scaling	DMSO	92.2	93.6		103.8				0.66		13.6	69
					H-	potential-pKa	scaling	DMSO	90 (87.9)	87	96.2	95.1	0.97	0.64		0.244	-1.148	30	71.6359
					Ph-	potential-pKa	scaling	DMSO	89 (88.5)	84.7		91.9				0.171	-0.994	27.9	72.3228
					p-MeO-C6H4-	potential-pKa	scaling	DMSO	86.8	83.4		89.6				0.13		28.5	71.2
					X = N-Me, R =
					Ph-	potential-pKa	Krylov'method	DMSO	73.5	72.8						-0.29	-1.23	28.3	67.4262
						potential-pKa	Krylov'method	MeCN	76.3	74.9
					Me2N-C6H4-	potential-pKa	Krylov'method	DMSO	70.1	70.3						-0.3	-1.42	29.2	72.3
							Krylov'method	MeCN		72.2
					H-	hydride transfer		MeCN	70	68.3	81	76	0.9	5.54		-0.189;-0.157				73 (73.7)
					R=
					p-CN-C6H4-CH2-	hydride transfer		MeCN	66.4
					p-CF3-C6H4-CH2-	hydride transfer		MeCN	65.6
					Ph-CH2-	hydride transfer		MeCN	64.8
					Me-	hydride transfer		MeCN	61.4
					H- (PheH2)
					R = CH2Ph, X =
					CN-	hydride transfer	scaling	MeCN	71.7	77.2	83.9	82.4
					NH2CO-	hydride transfer	scaling	MeCN	66.3	71.4	75.8	75.4				-0.37				72.6
					H-			MeCN				70.1
					R = Me, X =
					CN-	hydride transfer	scaling	MeCN	69.8	76.3	81.1	80.5
					NH2CO-	hydride transfer		MeCN	65.4
					R1 = CN, R2 = R4 = R5 = H, R3 =
					p-CN-C6H4-CH2-	calorimetry	scaling	MeCN		71.2	73.9	75.4				-0.501				73.8
					p-Cl-C6H4-CH2-	calorimetry	scaling	MeCN		70.4	72.4	73.9				-0.529				72.9
					p-F-C6H4-CH2-	calorimetry	scaling	MeCN		69.7	71.4	72.8				-0.541				72.2
					Ph-CH2-	hydride transfer	scaling	MeCN	63	69.1	71.6	73				-0.545				72.2
					p-Me-C6H4-CH2-	calorimetry	scaling	MeCN		69	70.6	72.5				-0.557				71.8
					p-MeO-C6H4-CH2-	calorimetry	scaling	MeCN		68.6	70.2	71.9				-0.565				71.5
					R1 = CHO, R2 = R4 = R5 = H, R3 =
					p-CN-C6H4-CH2-	calorimetry	scaling	MeCN		68	72.6	71.2				-0.507				72.6
					p-F-C6H4-CH2-	calorimetry	scaling	MeCN		65.9	70.6	69.3				-0.542				71.4
					Ph-CH2-	calorimetry	scaling	MeCN		64.6	70.5	67.9				-0.546				71.4
					p-Me-C6H4-CH2-	calorimetry	scaling	MeCN		64.9	70.1	68.5				-0.551				71.1
					p-MeO-C6H4-CH2-	calorimetry	scaling	MeCN		65	69.7	67.9				-0.557				70.9
					R1 = COMe, R2 = R4 = R5 = H, R3 =
					p-CN-C6H4-CH2-	calorimetry	scaling	MeCN		65.3	69	68.9				-0.635				72
					p-Cl-C6H4-CH2-	calorimetry	scaling	MeCN		63.9	67.6	67.5				-0.665				71.2
					p-F-C6H4-CH2-	hydride transfer	scaling	MeCN	60.7	63.6	67.2	67				-0.676				71.1
					Ph-CH2-	hydride transfer	scaling	MeCN	60	62.9	67.1	66.8				-0.68				71.1
					p-Me-C6H4-CH2-	calorimetry	scaling	MeCN		63.2	66.5	66.1				-0.688				70.7
					p-MeO-C6H4-CH2-	calorimetry	scaling	MeCN		62.7	66.2	65.7				-0.699				70.6
					R1 = R5 = COOEt, R2 = R4 = Me, R3 =
					Me- (MeHEH)	hydride transfer	scaling	MeCN	61.5*	56.4	69.9	65.7				-0.459				68.8
					H- (HEH)	calorimetry	scaling	MeCN		64.5	69.3	70.4	0.9	9		-0.512				68.7 (69.4)
					R1 = COOMe, R2 = R4 = R5 = H, R3 =
					p-CN-C6H4-CH2-	calorimetry	scaling	MeCN		65	67.9	69.1				-0.665				71.5
					p-Cl-C6H4-CH2-	calorimetry	scaling	MeCN		63.5	66.6	67.6				-0.699				71
					p-F-C6H4-CH2-	hydride transfer	scaling	MeCN	59.6	64.3	65.9	67.3				-0.709				70.6
					Ph-CH2-	hydride transfer	scaling	MeCN	59.5	63.2	65.8	66.9				-0.711				70.5
					p-Me-C6H4-CH2-	calorimetry	scaling	MeCN		62.8	65.2	66.3				-0.725				70.2
					p-MeO-C6H4-CH2-	calorimetry	scaling	MeCN		63.3	64.9	66.4				-0.733				70.1
					R1 = CONH2, R2 = R4 = R5 = H, R3 =
					p-CF3-C6H4-	calorimetry	scaling	MeCN		68	72.6	72.6				-0.373				69.5
					p-Br-C6H4-	calorimetry	scaling	MeCN		66	70.4 (72.2)	70.4				-0.505; -0.452				69.2
					p-Cl-C6H4-	calorimetry	scaling	MeCN		66.1	70.2 (72.5)	70.5				-0.506; -0.457				69.1
					Ph- (PNAH)	calorimetry	scaling	MeCN		64.6	68.8 (71)	68.9	0.87	7.53		-0.526; -0.524; -0.495				69.2 (68.5)
					p-Me-C6H4-	calorimetry	scaling	MeCN		63.9	67.5 (69.4)	68	0.95	7.68		-0.538; -0.579				69.2
					p-MeO-C6H4-	calorimetry	scaling	MeCN		63.7	66.9 (68.3)	67.2	0.92	8.11		-0.579; -0.617				69.4
					p-CN-C6H4-CH2-	calorimetry	scaling	MeCN		65	66.3	67.9				-0.744				71.8
					p-Cl-C6H4-CH2-	calorimetry	scaling	MeCN		63.6	65	66.4				-0.777				71.2
					p-F-C6H4-CH2-	hydride transfer	scaling	MeCN	57	62.7	64.3	65.3				-0.785				70.7
					Ph-CH2- (BNAH)	hydride transfer	scaling	MeCN	59	62.6	64.2	65.6	0.82	8.67		-0.789				67.9 (70.7)
					p-Me-C6H4-CH2-	calorimetry	scaling	MeCN		62	63.6	64.3				-0.797				70.3
					p-MeO-C6H4-CH2-	calorimetry	scaling	MeCN		62.5	63.1	64.7				-0.802				69.9
					Et-	calorimetry	scaling	MeCN		60.8	61.5	63.8				-0.85				69.4
					nBu-	calorimetry	scaling	MeCN		61.2	61.4	63.8				-0.834				68.9
					iPr	calorimetry	scaling	MeCN		60.6	61.3	63.2				-0.854				69.3
					nPr	calorimetry	scaling	MeCN		60.8	60.8	63.8				-0.838				68.5
					Me-	calorimetry	scaling	MeCN		61.9	60.7	64.4				-0.84				68.4
					R2 = R4 = R5 = H, R3 = Ph-CH2, R1 =
					-COOH	calorimetry	scaling	MeCN		65.4	67.5	68.9				-0.722				72.5
					-CONHPh	calorimetry	scaling	MeCN		62.6	65.9	66				-0.71				70.6
					-CONHEt	calorimetry	scaling	MeCN		60.9	63.8	63.8				-0.833				71.3
					-H	calorimetry	scaling	MeCN		50.7	53	52.6				-0.988				64.1
					-Me	hydride transfer	scaling	MeCN	43	49.4	48	51.8				-1.052				60.6
					R1 = CONH2, R2 = R4 = H, R3 = CH2-Ph, R5 =
					-Br	calorimetry	scaling	MeCN		70	68.2	73.5				-0.756				73.9
					-Me	calorimetry	scaling	MeCN		61.7	61.5	65.1				-0.667				68.9
					R1 = R2 = R4 = R5 = H, R3 =
					H- (1,4-PyrH2)
					R4 = CONH2, R1 = R2 = R5 = H, R3 =
					p-Cl-C6H4-	calorimetry	scaling	MeCN		61.3	71.3	67.9
					p-Br-C6H4-	calorimetry	scaling	MeCN		60.9	70.9	68
					Ph-	calorimetry	scaling	MeCN		62.7	67.3 (69.5)	67.3				-0.495				67
					p-Me-C6H4-	calorimetry	scaling	MeCN		61.9	67.9	66.3
					p-MeO-C6H4-	calorimetry	scaling	MeCN		61.9	66.8	65.6
					R1 = R2 = R4 = R5 = H, R3 =
					H- (1,2-PyrH2)					41.5
					X = O, R2 = R3 = H, R1 =
					p-Cl-C6H4-	calorimetry		MeCN			93.4					-0.422				91.4
					p-Br-C6H4-	calorimetry		MeCN			93.2					-0.427				93.2
					Ph-	calorimetry		MeCN			91.2					-0.481				90.6
					p-Me-C6H4-	calorimetry		MeCN			89.3					-0.519				89.6
					p-MeO-C6H4-	calorimetry		MeCN			88.3					-0.545				89.2
					X = S, R2 = R3 = H, R1 =
					m-Cl-C6H4-	calorimetry	scaling	MeCN		69.9	76.9	74.7				-0.656				80.3
					p-Br-C6H4-	calorimetry	scaling	MeCN		69.7	75.7	74.5				-0.696				80.1
					p-Cl-C6H4-	calorimetry	scaling	MeCN		69.3	75.6	74				-0.697				80
					m-MeO-C6H4-	calorimetry	scaling	MeCN		67.1	74.4	71.4				-0.73				79.5
					p-F-C6H4-	calorimetry	scaling	MeCN		68.8	73.7	73.6				-0.749				79.3
					Ph-	calorimetry	scaling	MeCN		68	73	72.6				-0.77				79.1
					m-Me-C6H4-	calorimetry	scaling	MeCN		66.4	72.1	72.7				-0.792				78.7
					p-Me-C6H4-	calorimetry	scaling	MeCN		67.2	71	71.5				-0.823				78.3
					p-MeO-C6H4-	calorimetry	scaling	MeCN		66.3	69.9	70.6				-0.853				77.9
					X = N-Me, R2 = R3 = H, R1 =
					p-NO2-C6H4-	calorimetry	scaling	MeCN		53.3	57.1	57.3	0.71	8.36		-1.202				73.1
					m-NO2-C6H4-	calorimetry	scaling	MeCN		53.5	56.9	57.2				-1.218				73.7
					p-CN-C6H4-	calorimetry	scaling	MeCN		52.6	56.7	56.4				-1.23				73.4
					p-Cl-m-Cl-C6H3-	calorimetry	scaling	MeCN		52.6	56.6	56.1				-1.247				73.7
					p-CF3-C6H4-	calorimetry	scaling	MeCN		51.8	56.5	55.6	0.71	8.74		-1.258				73.8
					p-Cl-m-F-C6H3-	calorimetry	scaling	MeCN		52.1	56.4	56				-1.256				73.7
					p-F-m-Br-C6H3-	calorimetry	scaling	MeCN		50.8	56	55.6				-1.27				73.6
					p-MeO-m-NO2-C6H3-	calorimetry	scaling	MeCN		52.4	55.9	55.7				-1.273				73.6
					m-Br-C6H4-	calorimetry	scaling	MeCN		49.8	55.7	54.8				-1.292				73.8
					p-F-m-F-C6H3-	calorimetry	scaling	MeCN		52.1	55.7	55.8				-1.288				73.7
					m-Cl-C6H4-	calorimetry	scaling	MeCN		51.3	55.6	55	0.71	9.38		-1.297				73.8
					p-Br-C6H4-	calorimetry	scaling	MeCN		50.4	55.2	54.2				-1.32				74
					p-Cl-C6H4-	calorimetry	scaling	MeCN		50.6	55.2	54.2				-1.318				73.9
					m-MeO-C6H4-	calorimetry	scaling	MeCN		49	54.6	52.6				-1.354				74.2
					p-MeO-m-Br-C6H3-	calorimetry	scaling	MeCN		49.7	54.6	53.2				-1.355				74.2
					Ph-	hydride transfer	scaling	MeCN	50.1	49.1	54.1	52.8	0.72	9.72		-1.394				74.6
					p-MeO-m-MeO-m-MeO-C6H2-	calorimetry	scaling	MeCN		50	54	52.8				-1.4				74.6
					m-Me-C6H4-	calorimetry	scaling	MeCN		47.1	53.8	52.8				-1.398				74.4
					o-HO-C6H4-	calorimetry	scaling	MeCN		47.5	53.8	50.4				-1.313				72.4
					p-MeO-m-MeO-C6H3-	calorimetry	scaling	MeCN		48.9	53.5	51.9				-1.425				74.7
					p-Me-C6H4-	calorimetry	scaling	MeCN		49.2	53.4	51.9	0.7	10.14		-1.426				74.6
					o-Cl-C6H4-	calorimetry	scaling	MeCN		50.5	53.2	52.5				-1.332				72.2
					p-Me-m-Me-C6H3-	calorimetry	scaling	MeCN		48.3	53.1	51.4				-1.446				74.8
					p-MeO-C6H4-	calorimetry	scaling	MeCN		48.5	52.9	51.5	0.72	10.01		-1.444				74.5
					p-HO-C6H4-	calorimetry	scaling	MeCN		48.9	52.6	51.8				-1.467				74.8
					o-Me-C6H4-	calorimetry	scaling	MeCN		46.3	51.4	50				-1.444				73
					p-Me2N-C6H4-	calorimetry	scaling	MeCN		44.9	50.6	49.2				-1.57				75.1
					H-	hydride transfer	scaling	MeCN	45	47	49.5	49.4				-1.543				73.4
					X = N-Me, R1 = Ph, R2 = H, R3 =
					CF3-	calorimetry	scaling	MeCN		55.7	61.9	58.9				-1.264				79.4
					Cl-	calorimetry	scaling	MeCN		52.3	58.2	56				-1.332				77.2
					Me-	calorimetry	scaling	MeCN		48.2	51	51.6				-1.447				72.7
					MeO-	calorimetry	scaling	MeCN		48.9	49.7	52.1				-1.464				71.8
					X = N-Me, R1 = Ph, R2 = R3 =
					Me	calorimetry		MeCN			49					-1.496				71.8
	OTHER				X =
					NO2-	potential-pKa	scaling	MeCN	72	79.3		86.1				0.12	-1.09	29	55.2368
					MeCO-	potential-pKa	scaling	MeCN	50	51.6		55				-0.47	-2.03	39	47.2004
					CN-	potential-pKa	scaling	MeCN	43	43.8		46.5				-0.53	-2.36	40.4	41.5002
					Cl-	potential-pKa	scaling	MeCN	37	25.7		24.7				-1.16	-2.56	50	49.9826
					F-	potential-pKa	scaling	MeCN	32	25.1		23.7				-1.26	-2.75	51.4	47.5108
					H-	potential-pKa	scaling	MeCN	22	18.3		17.3				-1.19	-3.21	50.3	35.4028
					Me-	potential-pKa	scaling	MeCN	19	16.5		16.6				-1.38	-3.23	52	37.2604
					MeO-	potential-pKa	scaling	MeCN	19	18.2		16.8				-1.51	-3.24	54.4	40.3034
					X =
					NO2-	potential-pKa		MeCN	70							0.158	-0.946	13.2	37.0062
					CHO-	potential-pKa		MeCN	63							-0.138	-1.165	16.6	36.5937
					PhCO-	potential-pKa		MeCN	62							-0.391	-1.288	22.2	41.3957
					CN-	potential-pKa		MeCN	59							-0.35	-1.294	20	38.2566
					PhS-	potential-pKa		MeCN	54							-0.651	-1.565	25.5	39.5093
					Cl-	potential-pKa		MeCN	52							-0.81	-1.644	28.2	41.3704
					Ph-	potential-pKa		MeCN	50							-0.918	-1.761	30.8	42.2187
					H-	potential-pKa		MeCN	48							-0.952	-1.838	31.1	40.8523
					Me-	potential-pKa		MeCN	48							-0.978	-1.843	31.8	41.6918
					MeO-	potential-pKa		MeCN	48							-1	-1.823	31.8	42.153
					NAD(P)H							77.1
					N,N-methylenetetrahydromethanopterin		calculation	MeCN		50		58							68.1
						potential-pKa	scaling	MeCN	59.7	53.6		56.3				-0.821
			4OH			potential-pKa	Krylov's method	DMSO	70.2	73.2						-0.38	-1.41	30.4
							Krylov's method	MeCN		75.1
			2OH			potential-pKa	Krylov's method	DMSO	58.2	61.1						-0.5	-1.39	23.4
							Krylov's method	MeCN	60.3	62.9
			3NH				Krylov's method	DMSO		46.9						-0.8
						hydride transfer	Krylov's method	MeCN	49.2	48.7
			CAFH				Krylov's method	MeCN		53.2	57.6					-1.49				80.3
SILICON - BASED					H3Si-H		isodesmic	MeCN		108.51		116.67								90.3
					Me2ClSi-H		isodesmic	MeCN		98.19		105.58	0.73	0.79
					PhH2Si-H		isodesmic	MeCN		96.3		104.62	0.71	0.06						88.2
					Ph2HSi-H		isodesmic	MeCN		91.62		98.31	0.73	1.52
					Ph3Si-H		isodesmic	MeCN		84.89		93.19	0.72	2.65
					Et3Si-H		isodesmic	MeCN		85.87		93.51	0.7	3.58
					Me2PhSi-H		isodesmic	MeCN		84.66		92.21	0.75	3.55
					(iPr)3Si-H		isodesmic	MeCN		84.23		94.21	0.73	2.93
					Me3Si-H								0.73	3.15						90.3
					(TMS)3Si-H								0.79	3.61
					(C6Me5)3Si-H		isodesmic	MeCN		74.33		84.4
BORON - BASED					(cateholate)BH		isodesmic	MeCN		159.2		167.06
					(pinacolate)BH		isodesmic	MeCN		128.7		136.7
					9-H-BBN		isodesmic	MeCN		99		106.56
					[H2(CN)B-H]-		isodesmic	MeCN		67.6		75.3	0.67	11.52
					[Cl3B-H]-		isodesmic	MeCN		66.2		73				-0.737
					[(C6F5)3B-H]-		isodesmic	MeCN		65		71.2				-0.89
					[(C6F5)2ClB-H]-		isodesmic	MeCN		64.7		71.2
					[(C6F5)2HB-H]-		isodesmic	MeCN		61.5		67.2
					[(C6F5)2PhB-H]-		isodesmic	MeCN		54.5		62.1
					[(C6F5)2MesB-H]-		isodesmic	MeCN		50.9		59.5				-1.44
					[H3B-H]-		isodesmic	MeCN		50.4		58.2	0.81 (Na+)	14.74
							isodesmic						0.77 (K+)	15.14
							isodesmic						0.79 (Bu4N+)	14.94
					[F3B-H]-		isodesmic	MeCN		49.1		56.2
					[(AcO)3B-H]-		isodesmic	MeCN		48.8		57	0.76	14.54
					[(C6F5)Ph2B-H]-		isodesmic	MeCN		44.9		51.7
					[Ph3B-H]-		isodesmic	MeCN		35.7		42.2				-2.017
					[9-H2-BBN]-		Isodesmic	MeCN		32.8		41.4
					[H2B(catecholate)]-		Isodesmic	MeCN		26.3		33.1
					[Et3B-H]-	hydride transfer	isodesmic	MeCN	26	24.4		32.2
					[Mes3B-H]-		isodesmic	MeCN		22.2		25.6				-2.45
					[(secBu)3B-H]-		isodesmic	MeCN		20		28.6
					[H2B(pinacolate)]-		isodesmic	MeCN		11.7		18.3
					[(tBu-O)3B-H]-		isodesmic	MeCN		0.62		9.23
					Et3N→Cl2B-H		isodesmic	MeCN		77.7		85.43
					Et3N→BBrH2								0.75	7.49
					2,6-lutidine→Cl2B-H		isodesmic	MeCN		73.2		81.9
					2,6-lutidine→BH3								0.75	10.33
					NH3BH3		isodesmic	MeCN		73.1		82
					Et3N→BH3								0.75	8.9
					DABCO→(catecholate)B-H		Isodesmic	MeCN		60.2		67.5
					NH3→(catecholate)B-H		Isodesmic	MeCN		59.6		67.6
					Et3N→(catecholate)B-H		Isodesmic	MeCN		55.1		63.4
					tBu3P→(catecholate)B-H		Isodesmic	MeCN		52.7		60.3
					(N-2,6-diisopropylphenyl)2NHC-9-H-BBN		Isodesmic	MeCN		47.7		56.7
					(N-isopropyl)2NHC-9-H-BBN		Isodesmic	MeCN		47		56
					(N-2,6-diisopropylphenyl)2NHC-9-H-BH3								0.81	9.55
					(N-isopropyl)2NHC-9-H-BH3								0.71	11.88
					pyridine→BH3								0.75	10.01
					p-MeO-pyridine→BH3								0.75	11.01
					p-Me2N-pyridine→BH3								0.76	12.44
					DABCO→(pinacolate)B-H		Isodesmic	MeCN		42.1		50.8
HYDRIDES OF OTHER NON-METALS	NITROGEN				X = S, R1 = R3, R2 =
					Br-			MeCN			111.9					0.81	-0.27			79.2
					Cl-			MeCN			111.3					0.79	-0.28			78.7
					H-		isodesmic	MeCN			109.7	107.8				0.73	-0.32			78.4
					Me-			MeCN			107.3					0.64	-0.35			77.6
					MeO-			MeCN			104.5					0.53	-0.4			76.8
					Me2N-		scaling	MeCN		83.4	95.1	90.9				0.2	-0.58			73.3
					X = S, R2 = R3, R1 =
					Cl-			MeCN			111.4					0.79	-0.28			81.5
					Me-			MeCN			108.3					0.67	-0.34			81.1
					MeO-			MeCN			107.1					0.64	-0.34			81
					X = S, R1 = H, R2 = R3 =
					Br-			MeCN			114.2					0.87	-0.23			82.4
					Cl-			MeCN			113.4					0.86	-0.24			81.9
					Me-			MeCN			105.1					0.56	-0.38			80.6
					MeO-		scaling	MeCN		90.1	99.5	98.3				0.4	-0.52			78.9
					Me2N-		scaling	MeCN		71.9	84.4	78.3				-0.14	-0.78			75.8
					R1 = R2 = R3 = H, X =
					O		isodesmic	MeCN			108.3	108.7				0.76	-0.35			79
					N-Me		isodesmic	MeCN			91.1	91.1				0.16	-0.79			75.7
					FMNH2							76.9
					EtFl-		Krylov's method			58.4
	OXYGEN				R2 = R3 = R4 = H, R1 =
					CN-		isodesmic	DMSO		83.6
					Cl-		isodesmic	DMSO		72.8
					H-	potential-pKa	scaling	DMSO	70	68.6		73.4				-0.319	-1.21	26.2	65.6
					Me-		isodesmic	DMSO		67.2
					R1 = R2 = R3 = R4 =
					CN-		isodesmic	DMSO		112.7
					Cl-	potential-pKa	scaling	DMSO	83	83.2		92				0.17	-0.645	17.6	66.3
					Me-	potential-pKa	scaling	DMSO	58	54.9		56.8				-0.635	-1.5	27.1	59.6
					R1 = R2 = Cl, R3 = R4 =
					CN-	potential-pKa	scaling	DMSO	101	99.2		112.2				0.62	-0.05	13.5	74.5
					R2 = R3 = R4 = H, R1 =
					CN-		isodesmic	DMSO		93.1
					Cl-		isodesmic	DMSO		85.8
					H-	potential-pKa	scaling	DMSO	64	82.1		91				-0.49	-1.36	27.2	62.9
					Me-		isodesmic	DMSO		79.6
					R1 = R2 = R3 = R4 =
					CN-		isodesmic	DMSO		124,5
					Cl-	potential-pKa	isodesmic	DMSO	70.1	93.9						0.348	-0.567	18.9	70.1
					Me-		isodesmic	DMSO		73.9
							isodesmic	DMSO		61.1
							isodesmic	DMSO		71.3
							isodesmic	DMSO		47.4
							isodesmic	DMSO		62.3
	PHOSPHORUS
							isodesmic	MeCN		78.08		84.52
							Krylov	MeCN		52
							isodesmic	MeCN		44.4		53
	Ge				R =
					Ph-		isodesmic	MeCN		80.2		85.8	0.62	3.99
					nBu-								0.73	5.92
	Te
					NaTeH
